# Supplementary material for: Structural, physicochemical and dynamic features conserved within the aerolysin pore-forming toxin family
Source: PubMed Central journal article supplement (PMC5654971; doi:10.1038/s41598-017-13714-4), 2017-10-24
Supplement: 41598_2017_13714_MOESM1_ESM.pdf [file 41598_2017_13714_MOESM1_ESM.pdf]

# **Structural, physicochemical and dynamic features conserved within the aerolysin pore-forming toxin family**

Nuria Cirauqui<sup>1,2</sup>, Luciano A. Abriata<sup>1</sup>, F. Gisou van der Goot<sup>3</sup> and Matteo Dal Peraro<sup>1\*</sup>

<sup>1</sup>Institute of Bioengineering, School of Life Sciences, École Polytechnique Fédérale de Lausanne (EPFL) and Swiss Institute of Bioinformatics, 1015 Lausanne, Switzerland

<sup>2</sup>Department of Pharmaceutical Biotechnology, Universidade Federal do Rio de Janeiro, 21941-902 Rio de Janeiro, Brazil

<sup>3</sup>Global Health Institute, School of Life Sciences, École Polytechnique Fédérale de Lausanne (EPFL) and Swiss Institute of Bioinformatics, 1015 Lausanne, Switzerland

## **Supplementary Information**

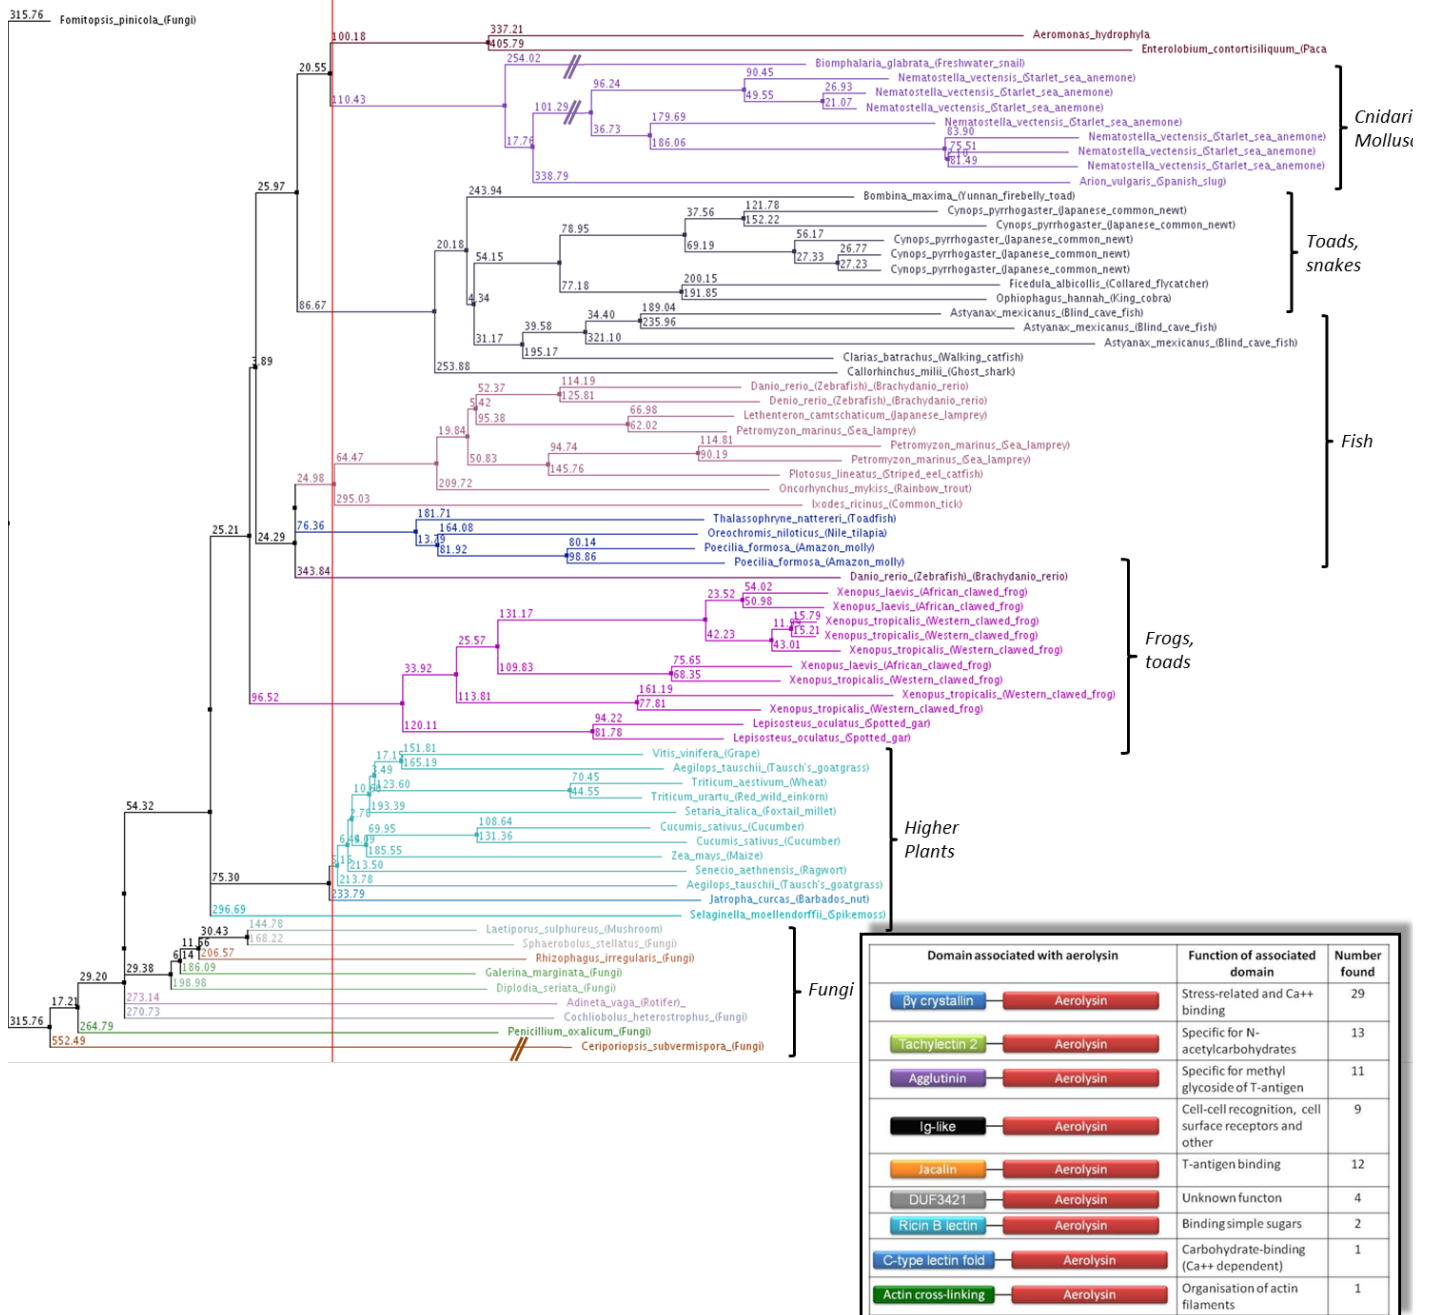

**Supplementary Figure S1. Phylogenetic tree of eukaryotic proteins containing an aerolysin domain.** Previously known sequences of aerolysin proteins from different species (prokaryotic and eukaryotic) were blasted against UniProt. Sequences with identity above 30% and E-value threshold below  $10^{-9}$  were retained. The phylogenetic tree was calculated using the neighbor-joining method with the PAM250 substitution matrix. Groups which appear to be evolutionary closer are presented in the same color and distance values between the branches are shown. Common names are given for groups of related species. Relative to the work by Szczyzny *et al.*<sup>1</sup>, the total number of new eukaryotic proteins with aerolysin domains is 55 and the number of new eukaryotic species with aerolysin domains is 30.

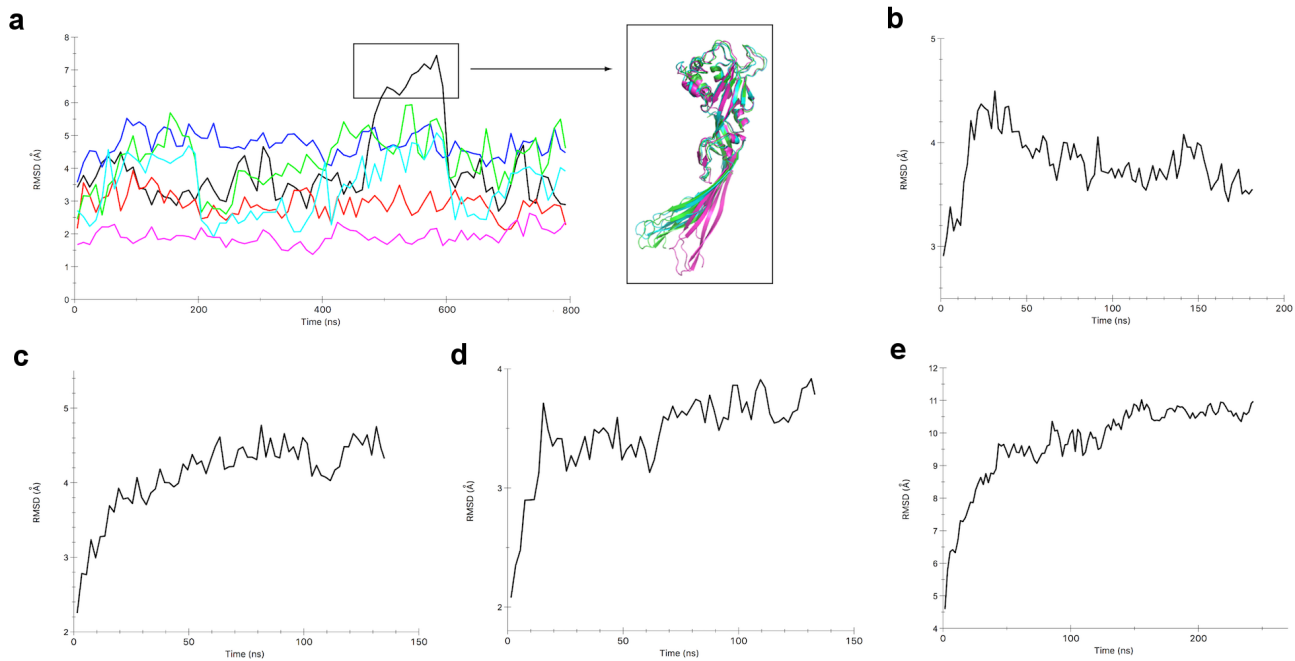

**Supplementary Figure S2. Root Mean Square Deviation (RMSD) during the MD simulations.** (a) Trajectory RMSD for the monomeric forms, taking as reference each initial conformation (corresponding x-ray structure), and averaged in 10 ns windows: aerolysin wt (red), aerolysin Y221G (black), ETX wt (green), ETX H162A (blue), parasporin-2 (magenta) and LSL (cyan). In the close-up, the aerolysin Y221G initial conformation (green), together with a conformation at 529 ns (magenta) and other at 634 ns (cyan) are represented as cartoons, showing that after a conformational change at 500-600 ns, aerolysin Y221G returns to its initial conformation. (b) Trajectory RMSD for the equilibration MD of the wt prepore model, taking as reference the initial model created from the x-ray structure of the aerolysin Y221G, and averaged in 2 ns windows. (c) Trajectory RMSD for the 130 ns of the wt prepore in water, taking as reference the average structure of the equilibration MD (b), and averaged in 2 ns windows. (d) Trajectory RMSD for the 130 ns of the wt prepore in presence of a lipid bilayer, taking as reference the average structure of the equilibration MD (b), and averaged in 2 ns windows. (e) Trajectory RMSD of the pore MD, taking as reference the model based on the quasi-pore structure<sup>2</sup>, and averaged in 2 ns windows. The equilibration phase is not shown on the plots.

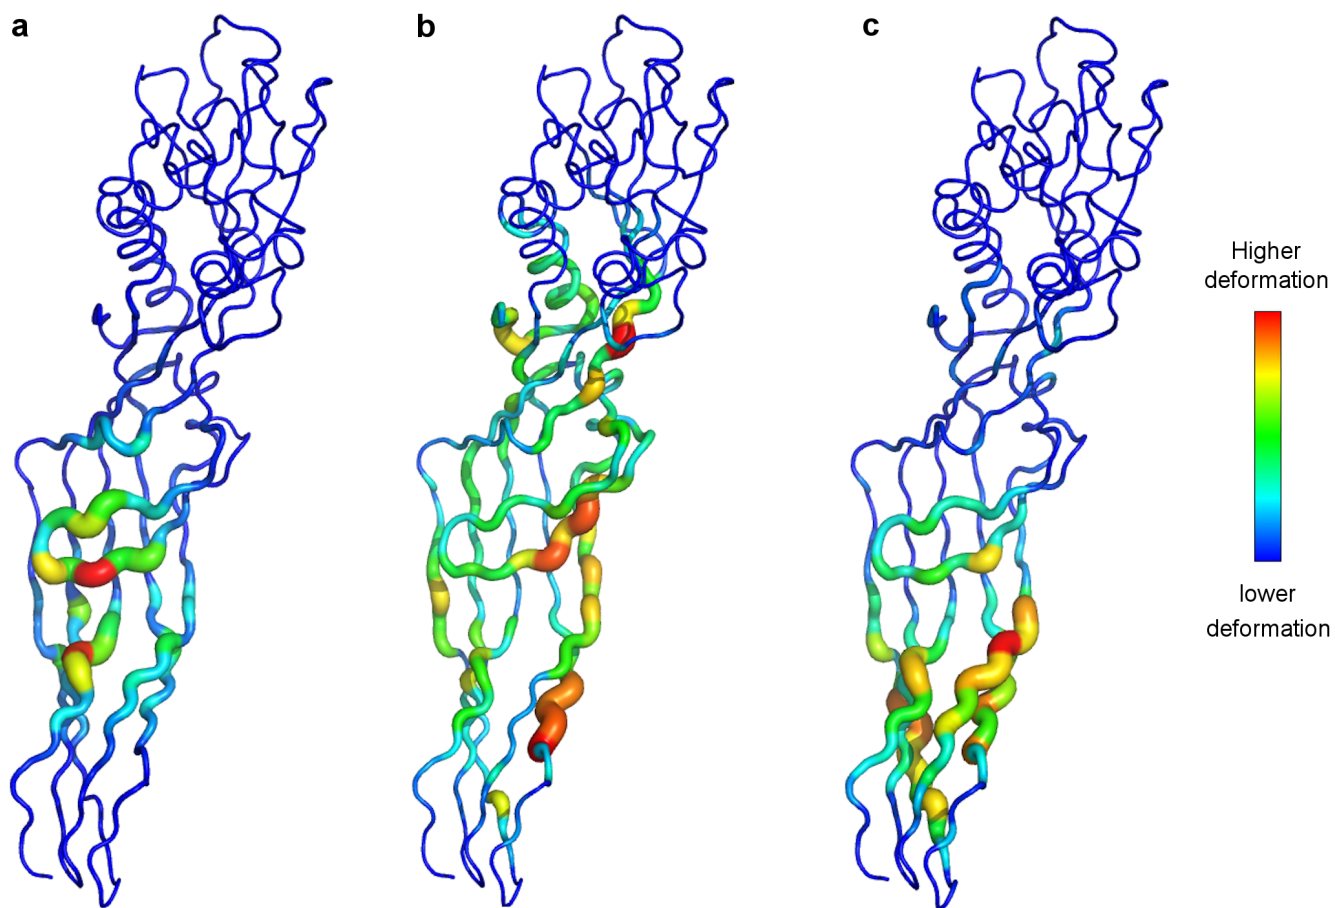

**Supplementary Figure S3. Hinge regions of the first three principal components of the aerolysin-like monomers MD.** Representation of the hinge residues for each of the three first PCs, shown here for the aerolysin Y221G toxin, where warmer colors indicate regions more involved in the deformation for that motion: (a) PC1, (b) PC2, (c) PC3.

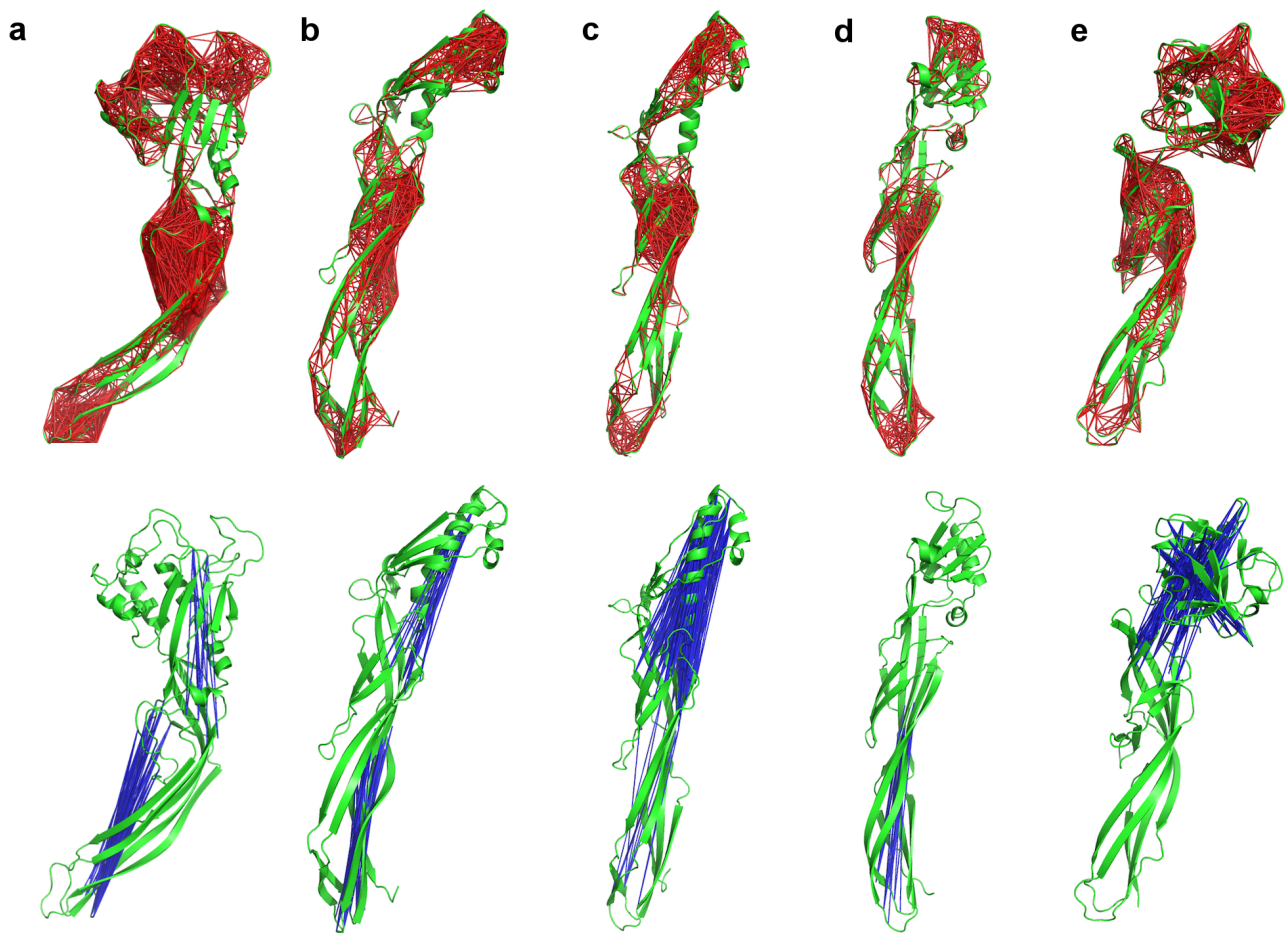

**Supplementary Figure S4. Strongest cross-correlations found during the aerolysin-like monomers MD.** Correlated (up) and anti-correlated (down) residues depicted with red and blue lines, respectively, as calculated from the MD trajectories of: **(a)** aerolysin Y221G, **(b)** ETX wt, **(c)** ETX H162A, **(d)** parasporin-2, **(e)** LSL.

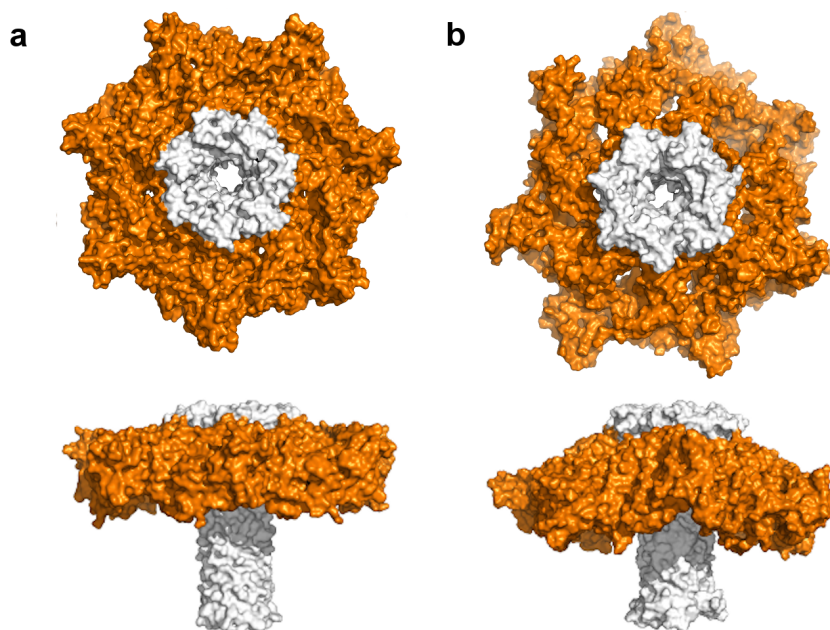

**Supplementary Figure S5. New disposition of the MB domains of the aerolysin pore obtained upon MD simulation.** (a) Molecular surface of the initial pore structure<sup>2</sup> (PDB entry 5JZW) from a view above (up) and parallel (down) the membrane plane. (b) Molecular surface of conformation closest to the production run average of the 250 ns of unrestrained atomistic MD, from a view above (up) and parallel (down) the membrane plane. For both **a** and **b**, the DBB and the TM barrel are shown in white, with domain 3 together with the MB domains in orange. The MD conformation (**b**) resembles the scan-size images of the crystalline aerolysin pore in He *et al.*, 2016<sup>3</sup>, which showed a star-shaped topography of the pore (**c**, up) and a central ring greater in height than the radially projecting arms (**c**, down).

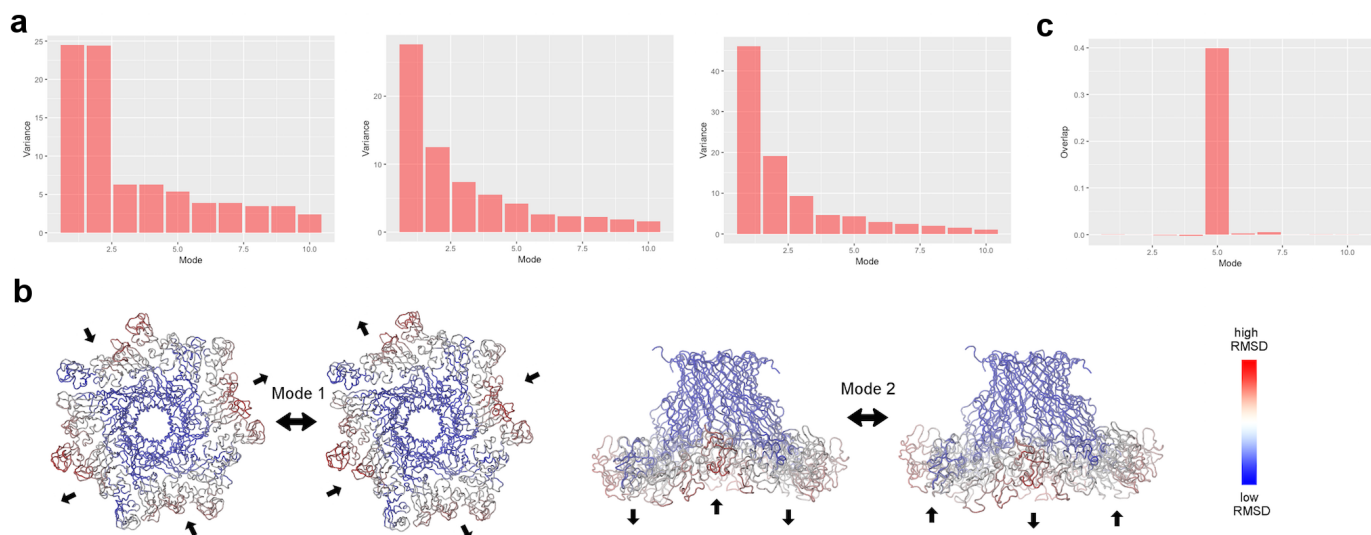

**Supplementary Figure S6. Supplementary data about the NMA and the PCA of both pre-pore and pore states of aerolysin.** (a) Percentage of variance calculated for the first 10 modes (or PCs) as obtained, from left to right, from: NMA of the aerolysin pre-pore structure, PCA of the MD trajectory of aerolysin pre-pore in presence of a lipid bilayer, PCA of the MD trajectory of aerolysin pore. (b) Representation of the motions described by modes 1 and 2 as calculated by NMA of the aerolysin pre-pore structure. (c) Overlap between the pre-pore NMs and the vector calculated between the pre-pore and the pore structures.

**Supplementary Table S1. Summary of the Molecular Dynamics (MD) simulations performed in this work.**

| <b>Conformational state</b> | <b>Initial Structure</b>                           | <b>Simulation time (ns)</b> |
|-----------------------------|----------------------------------------------------|-----------------------------|
| Monomer                     | Aerolysin wt                                       | 800                         |
|                             | Aerolysin Y221G                                    | 800                         |
|                             | ETX wt                                             | 800                         |
|                             | ETX H162A                                          | 800                         |
|                             | Parasporin-2                                       | 800                         |
|                             | LSL                                                | 800                         |
| Prepore                     | Aerolysin wt model<br>(for equilibration purposes) | 180                         |
|                             | Equilibrated model of aerolysin wt (in water)      | 130                         |
|                             | Equilibrated model of wt (with lipid membrane)     | 130                         |
| Pore                        | Aerolysin wt pore model                            | 250                         |



**Supplementary Table S2. Comparison between the *in silico* results obtained in this work, and previously published mutational experiments of aerolysin toxin, together with an overview of the roles proposed here for each amino acid, according to Figure 6.**

| Amino acid <sup>a</sup> | <i>In silico</i> results <sup>b</sup>                                                                                                                                                                                                             | Mutational data <sup>c</sup>                                                                                                            | Proposed roles <sup>d</sup>                                                                                                                     |
|-------------------------|---------------------------------------------------------------------------------------------------------------------------------------------------------------------------------------------------------------------------------------------------|-----------------------------------------------------------------------------------------------------------------------------------------|-------------------------------------------------------------------------------------------------------------------------------------------------|
| P248                    | Conserved residue                                                                                                                                                                                                                                 | Decreased pore formation <sup>4</sup>                                                                                                   | Creates a kink on the stem loop to help sliding during pore formation                                                                           |
| N206, V285-A287         | Conserved residues                                                                                                                                                                                                                                | No data found                                                                                                                           | Due to its location on the DBB loops, they could help in several steps, as the motion described in PC2 (creation of a more concentric DBB fold) |
| W227                    | Conserved residue, related to descriptors about backbone conformation                                                                                                                                                                             | Mutation for other residues impairs protein secretion by bacteria, and therefore its role on pore-formation was not tested <sup>5</sup> | Pushes away the stem loop for its release during pore formation                                                                                 |
| Y221                    | Related to descriptors about backbone conformation, decreased cross-correlations between strands $\beta$ 2- $\beta$ 3 and strands $\beta$ 1- $\beta$ 4- $\beta$ 5 on the mutant Y221G, hinge on the motions related to oligomerization (PC1, PC3) | Oligomerizes in the prepore state but does not form pores <sup>6</sup>                                                                  | Pushes away strands $\beta$ 2- $\beta$ 3 for its release during pore formation, also involved in oligomerization                                |
| Q263                    | Related to descriptors about backbone conformation                                                                                                                                                                                                | No data found                                                                                                                           | Rotation point on the stem loop release                                                                                                         |
| T273                    | Related to descriptors about backbone conformation, hinge on the motion related DBB formation (PC2)                                                                                                                                               | No data found                                                                                                                           | Acts as hinge on the motions described in PC2 (creation of a more concentric DBB fold)                                                          |
| E296                    | Related to descriptors about backbone conformation, hinge on the motions related to oligomerization (PC1, PC3)                                                                                                                                    | No data found                                                                                                                           | Involved in oligomerization                                                                                                                     |
| L277                    | Related to descriptors about backbone conformation, hinge on the motions related to oligomerization (PC1, PC3). For ETX, a mutation on the                                                                                                        | No data found                                                                                                                           | Pushes away strands $\beta$ 2- $\beta$ 3 for its release during pore formation, Involved in oligomerization                                     |

|                                       |                                                                                                                                                        |                                                            |                                                                   |
|---------------------------------------|--------------------------------------------------------------------------------------------------------------------------------------------------------|------------------------------------------------------------|-------------------------------------------------------------------|
|                                       | corresponding position (H162A) presented decreased cross-correlations between strands $\beta$ 2- $\beta$ 3 and strands $\beta$ 1- $\beta$ 4- $\beta$ 5 |                                                            |                                                                   |
| E254                                  | Hinge on the motions related to oligomerization (PC1, PC3)                                                                                             | E254C: Slight reduction in hemolytic activity <sup>4</sup> | Involved in oligomerization                                       |
| W247                                  | Strong cross-correlations with the DBB region found during the MD of the active aerolysin monomer                                                      | W247C: No hemolytic activity <sup>4</sup>                  | May help in both oligomerization and pore-formation               |
| K246                                  | Strong cross-correlations with the DBB region found during the MD of the active aerolysin monomer                                                      | K246C: Slight reduction in hemolytic activity <sup>4</sup> | May help in both oligomerization and pore-formation               |
| P181                                  | Strong cross-correlations with the DBB region found during the MD of the active aerolysin monomer                                                      | No data found                                              | May help in both oligomerization and pore-formation               |
| R288-K290, L421, P422                 | Strong cross-correlations with the stem loop region found during the MD of the active aerolysin monomer                                                | No data found                                              | May help in both oligomerization and pore-formation               |
| R144 G366-V368                        | Main hinge residues on the piston-like motion                                                                                                          | No data found                                              | Important for TM pore insertion on the membrane                   |
| P305                                  | Conserved residue, strong cross-correlations on the piston-like motion                                                                                 | No data found                                              | Creates a kink to move up MB domain during the piston-like motion |
| S133-Y136, Q379-N384, D182-G187, Y304 | Strong cross-correlations on the piston-like motion                                                                                                    | No data found                                              | Important for TM pore insertion on the membrane                   |
| R336                                  | Membrane interactions during prepore and pore MD                                                                                                       | R336A does not form pores <sup>7</sup>                     | Important for membrane binding and therefore TM insertion         |
| R163                                  | Membrane interactions during prepore and pore MD                                                                                                       | No data found                                              | Important for membrane binding and therefore TM insertion         |
| W324                                  | Membrane interactions                                                                                                                                  | W324A reduced pore                                         | Important for membrane                                            |

|           |                                                  |                                                      |                                                           |
|-----------|--------------------------------------------------|------------------------------------------------------|-----------------------------------------------------------|
|           | during prepore and pore MD                       | formation <sup>8</sup>                               | binding and therefore TM insertion                        |
| Y162      | Membrane interactions during prepore and pore MD | Y162A small reduction in pore formation <sup>8</sup> | Important for membrane binding and therefore TM insertion |
| H132      | Membrane interactions during prepore and pore MD | H132D, H132N: Impaired oligomerization <sup>8</sup>  | Important for membrane binding and therefore TM insertion |
| W45, H332 | Membrane interactions during prepore and pore MD | No data found                                        | Important for membrane binding and therefore TM insertion |

<sup>a</sup>Aerolysin amino acid

<sup>b</sup>*In silico* results obtained in this work for that amino acid

<sup>c</sup>Data found on the literature about aerolysin mutants on that position

<sup>d</sup>Roles proposed in this work for that amino acid based on our *in silico* results

## References

1. Szczesny, P. *et al.* Extending the Aerolysin Family: From Bacteria to Vertebrates. *PLoS ONE* **6**, e20349 (2011).
2. Iacovache, I. *et al.* Cryo-EM structure of aerolysin variants reveals a novel protein fold and the pore-formation process. *Nat. Commun.* **7**, 12062 (2016).
3. He, J. *et al.* Single molecule atomic force microscopy of aerolysin pore complexes reveals unexpected star-shaped topography: Structural Studies of Aerolysin Pore Complexes. *J. Mol. Recognit.* **29**, 174–181 (2016).
4. Iacovache, I. *et al.* A rivet model for channel formation by aerolysin-like pore-forming toxins. *EMBO J.* **25**, 457–466 (2006).
5. Wong, K. R. & Buckley, J. T. Site-directed mutagenesis of a single tryptophan near the middle of the channel-forming toxin aerolysin inhibits its transfer across the outer membrane of *Aeromonas salmonicida*. *J. Biol. Chem.* **266**, 14451–14456 (1991).
6. Tsitrin, Y. *et al.* Conversion of a transmembrane to a water-soluble protein complex by a single point mutation. *Nat. Struct. Biol.* **9**, 729–733 (2002).
7. Osusky, M., Teschke, L., Wang, X., Wong, K. & Buckley, J. T. A Chimera of Interleukin 2 and a Binding Variant of Aerolysin Is Selectively Toxic to Cells Displaying the Interleukin 2 Receptor. *J. Biol. Chem.* **283**, 1572–1579 (2008).
8. MacKenzie, C. R., Hiram, T. & Buckley, J. T. Analysis of Receptor Binding by the Channel-forming Toxin Aerolysin Using Surface Plasmon Resonance. *J. Biol. Chem.* **274**, 22604–22609 (1999).
